# Supplementary material
Source: PubMed Central journal article supplement (PMC4793377)

Online Supplementary Figure

Flow chart of selection of reports and interventions

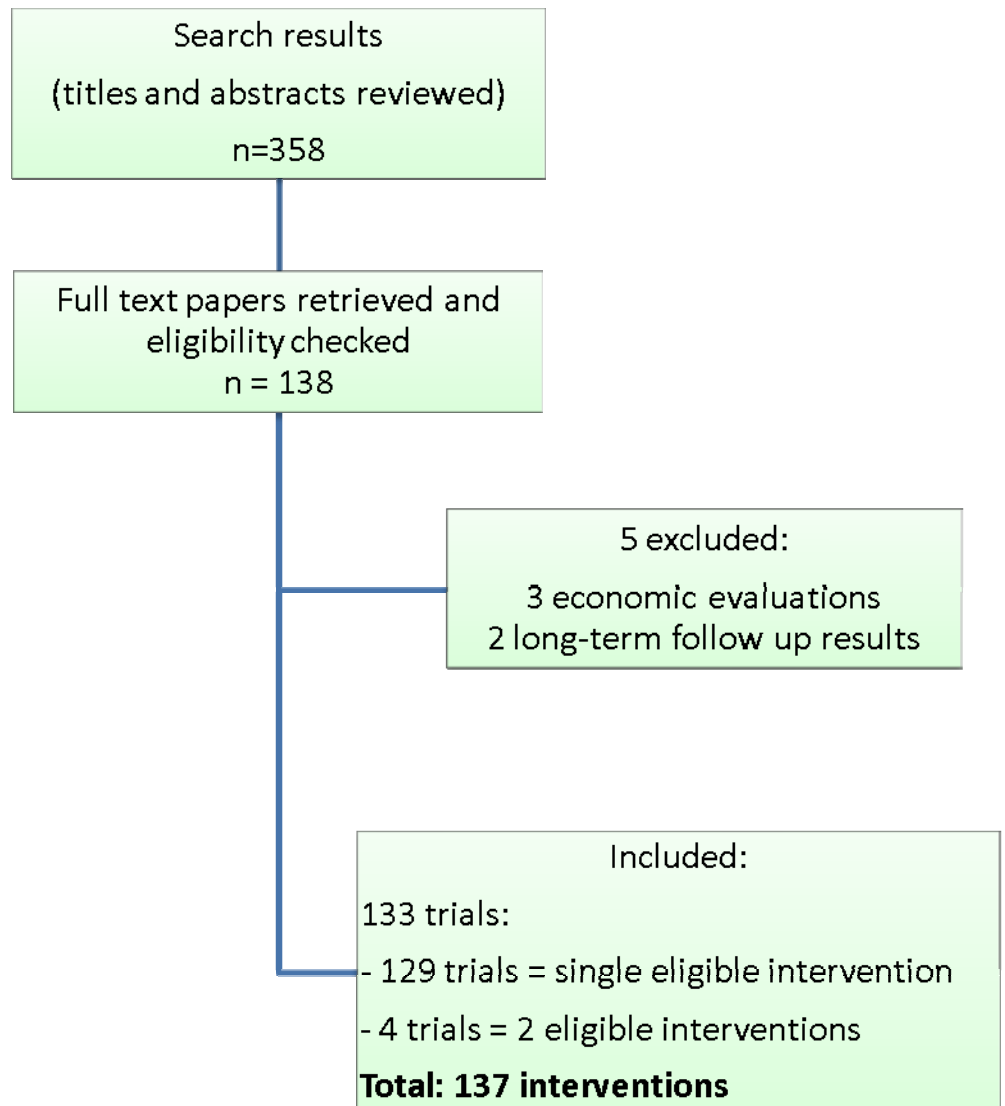

Supplement: hoft011296.ww1_default.pdf [file hoft011296.ww1_default.pdf]
